# Supplementary material
Source: HighWire-hosted journal article supplement (https://ard.bmj.com/content/76/10/1755)
Supplement: inline-supplementary-material-7 [file inline-supplementary-material-7.xlsx]

## Sheet: Sheet1
Supplementary table S5. Top ten upregulated genes for each cluster.
Average fold change (FC) in pSS compared to Healthy control group at day 0. The top ten genes with highest FC were selected and average calculated.
	FC d0
C1: Type I IFN pathway			C2: Antigen presentation			C3: BCR signaling			C4: B cell development			C5: Plasma cell development, inhibiting			C6: Lymphocyte adhesion and migration			C7: IL-10 signaling			C8: Lymphocyte proliferation			C9: NFkB signaling			C10: BAFF and APRIL signaling			C11: Anti-apoptosis			C12: CD40 signaling			C13: Endosomal TLR signaling			C14: Plasma cell development, promoting
Gene	FC d0		Gene	FC d0		Gene	FC d0		Gene	FC d0		Gene	FC d0		Gene	FC d0		Gene	FC d0		Gene	FC d0		Gene	FC d0		Gene	FC d0		Gene	FC d0		Gene	FC d0		Gene	FC d0		Gene	FC d0
FC top 10	3.74471		FC top 10	3.37077		FC top 10	3.21867		FC top 10	3.0848		FC top 10	3.05586		FC top 10	2.60346		FC top 10	2.54669		FC top 10	2.37155		FC top 10	2.35719		FC top 10	2.30214		FC top 10	2.23061		FC top 10	2.14292		FC top 10	2.14268		FC top 10	1.9856
MX1	5.71025		B2M	5.60277		PAX5	3.77172		TNFRSF13C	3.74574		PAX5	3.77172		SELE	7.13598		STAT3	3.72908		TNFRSF13C	3.74574		NFKBIA	3.37683		TNFRSF17	3.74574		CD83	3.9302		NFKBIA	3.37683		NFKB2	2.76937		TNFRSF13C	3.74574
B2M	5.60277		HLA-DRB3	3.66861		CD19	3.73215		CD19	3.73215		CD19	3.73215		CXCR4	3.76795		SOCS3	3.37683		CD79A	3.55418		NFKB2	2.76937		NFKBIA	3.37683		NFKB2	2.76937		NFKB2	2.76937		IRF7	2.66247		POU2F2	2.35774
IFITM1	4.85391		HLA-DRB1	3.31492		CD79A	3.55418		CD79A	3.55418		CD79A	3.55418		SYK	2.71212		NFKBIA	2.76937		CD74	3.28399		MAP4K4	2.58577		NFKB2	2.76937		IL2RG	2.32945		MAPK14	2.11365		IRF1	2.30995		IRF4	2.07872
STAT1	3.46931		CD74	3.28399		CD81	3.38916		HLA-DRB1	3.31492		HLA-DRB1	3.31492		CCR7	2.62148		MAPK1	2.58577		IL4R	2.47088		TNFRSF14	2.26396		NFATC3	2.15566		MYD88	2.18871		CD40	2.10201		MYD88	2.18871		JAK3	1.97296
NFKBIA	3.37683		HLA-B	3.10716		NFKBIA	3.37683		CD74	3.28399		CD74	3.28399		ITGB2	2.04252		MAP4K4	2.52249		CD40	2.10201		MYD88	2.18871		MAPK14	2.11365		CD40	2.10201		MAPKAPK2	2.05919		MAPK14	2.11365		BCL2	1.80246
HLA-B	3.10716		HLA-DMB	3.05432		PTPN22	3.19774		HLA-DMB	3.05432		HLA-DMB	3.05432		ITGA4	2.04102		JAK1	2.47088		PRKCD	1.94562		TBK1	2.16984		NFATC1	1.84729		IRAK1	2.03188		JAK3	1.97296		MAPKAPK2	2.05919		XBP1	1.73452
HLA-C	3.03253		HLA-C	3.03253		CD22	3.07909		HLA-DRA	2.76013		HLA-DRA	2.76013		PTPRC	1.58296		IL2RG	2.32945		BCL2	1.80246		CD40	2.10201		TRAF5	1.80345		TRAF3	1.80345		TRAF3	1.80345		IRAK1	2.03188		PTPN2	1.66758
PSMB8	2.77251		HLA-DPA1	2.99289		NFKB2	2.76937		SYK	2.71212		SYK	2.71212		TBX21	1.45246		NFKB2	2.11365		NFATC2	1.63106		ITGB2	2.04252		MAPK1	1.76696		BCL2	1.80246		MAPK1	1.76696		IRF5	1.7982		ADA	1.59072
NFKB2	2.76937		HLA-DPB1	2.87798		SYK	2.71212		MS4A1	2.41738		BLNK	2.27303		CCR2	1.38945		BCL2	1.80246		ADA	1.59072		ITGA4	2.04102		TRAF1	1.72502		TRAF5	1.71749		STAT3	1.74735		MAPK1	1.76696		PRDM1	1.45825
STAT2	2.75247		PSMB8	2.77251		PTPN6	2.60434		BLNK	2.27303		CD40	2.10201		ITGAL	1.28872		MAPK14	1.76696		TNFRSF13B	1.58883		IRAK1	2.03188		RELB	1.71749		NFATC2	1.63106		TRAF5	1.71749		CHUK	1.72646		TRAF6	1.44734
